# Supplementary material
Source: Springer Nature journal article supplement (https://www.springermedizin.de/resource/supplementary/13054_2012_2190_MOESM5_ESM.pdf/9712640)

**A**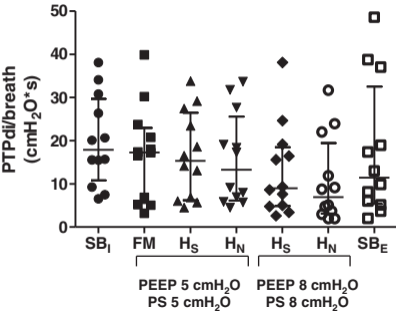**B**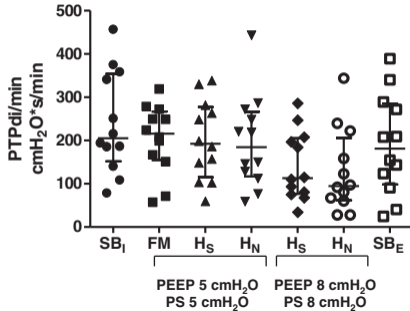**C**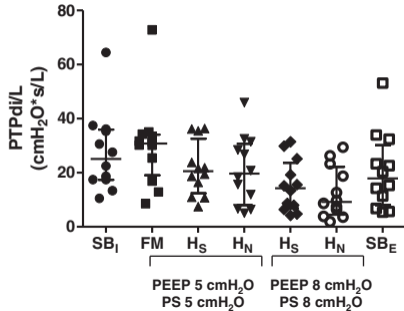

Supplement: MOESM5 [file 9712640]
